# Supplementary material for: The Effects of Mild Intermittent Hypoxia Exposure on the Abdominal Subcutaneous Adipose Tissue Proteome in Overweight and Obese Men: A First-in-Human Randomized, Single-Blind, and Cross-Over Study
Source: PubMed Central journal article supplement (PMC8764283; doi:10.3389/fphys.2021.791588), 2022-01-04
Supplement: Data_Sheet_1.pdf [file Data_Sheet_1.pdf]

## Supplementary Material

### 1 Supplementary Figures

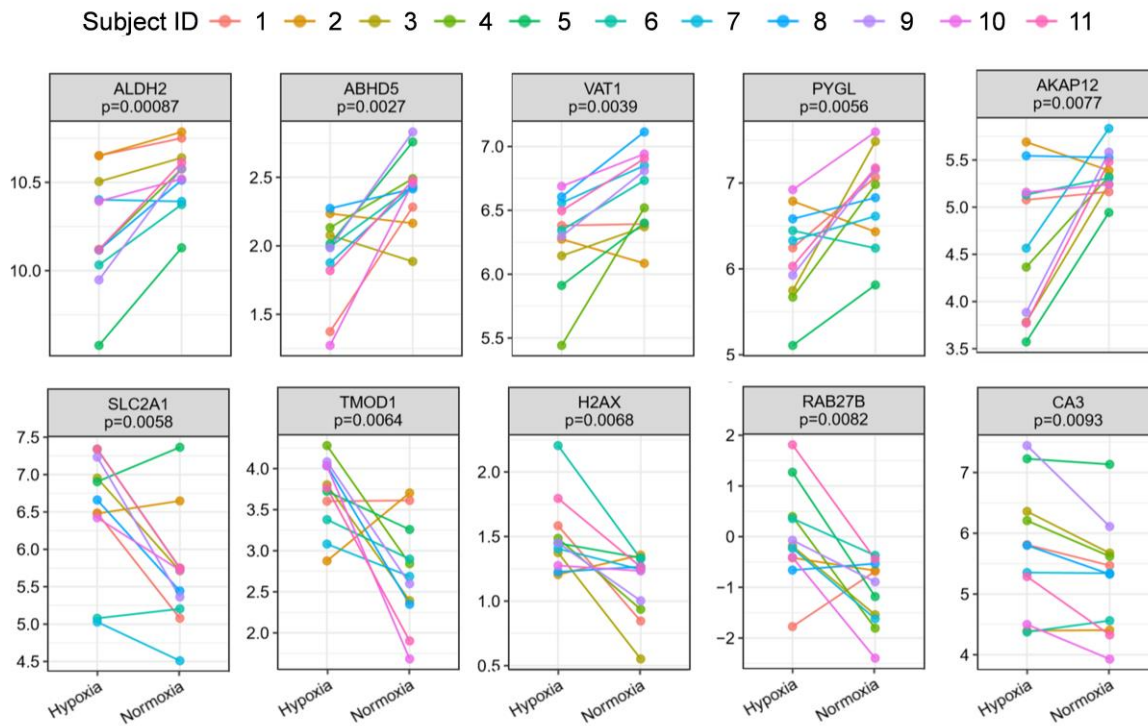

**Supplementary Figure 1.** Differentially expressed proteins in abdominal subcutaneous adipose tissue following MIH and normoxia exposure. Log<sub>2</sub> protein expression is depicted for each individual separately ( $n=11$ ), with corresponding  $p$ -value for top five up/downregulated (based on  $p$ -value) protein. ALDH2, aldehyde dehydrogenase 2; ABHD5, abhydrolase domain containing 5; VAT1, vesicle amine transport 1; PYGL, glycogen phosphorylase 1; AKAP12, a-kinase anchoring protein 12; SLC2A1, solute carrier type 2A1/glucose transporter-1; TMOD1, tropomodulin-1; H2AX, H2A histone family member X; CA3, carbonic anhydrase III.

## 2 Supplementary Tables

**Supplementary Table 1.** Proteins exclusively expressed by blood and identified in human adipose tissue biopsies.

| Category             | Group             | Uniprot | Name                                                                            |
|----------------------|-------------------|---------|---------------------------------------------------------------------------------|
| Hemoglobins          | Hemoglobins       | P69905  | Hemoglobin subunit alpha                                                        |
| Hemoglobins          | Hemoglobins       | P68871  | Hemoglobin subunit beta                                                         |
| Hemoglobins          | Hemoglobins       | P69891  | Hemoglobin subunit gamma-1                                                      |
| Hemoglobins          | Hemoglobins       | P69892  | Hemoglobin subunit gamma-2                                                      |
| Hemoglobins          | Hemoglobins       | P02042  | Hemoglobin subunit delta                                                        |
| Hemoglobins          | Hemoglobins       | P02008  | Hemoglobin subunit zeta                                                         |
| Hemoglobins          | Hemoglobins       | P02100  | Hemoglobin subunit epsilon                                                      |
| Hemoglobins          | Hemoglobins       | Q6B0K9  | Hemoglobin subunit mu                                                           |
| Hemoglobins          | Hemoglobins       | P09105  | Hemoglobin subunit theta-1                                                      |
| Serum albumin        | Albumin           | P02768  | Serum albumin                                                                   |
| Erythrocyte proteins | Erythrocyte       | P02549  | spectrin alpha chain, erythrocytic 1                                            |
| Erythrocyte proteins | Erythrocyte       | P11277  | Spectrin beta chain, erythrocytic (Beta-I spectrin)                             |
| Erythrocyte proteins | Erythrocyte       | P16157  | Ankyrin-1                                                                       |
| Erythrocyte proteins | Erythrocyte       | P16452  | Erythrocyte membrane protein band 4.2                                           |
| Erythrocyte proteins | Erythrocyte       | P11171  | Erythrocyte membrane protein band 4.1                                           |
| Erythrocyte proteins | Erythrocyte       | Q00013  | 55 kDa erythrocyte membrane protein                                             |
| Erythrocyte proteins | Erythrocyte       | P27105  | Erythrocyte band 7 integral membrane protein                                    |
| Erythrocyte proteins | Erythrocyte       | Q02094  | Ammonium transporter Rh type A (Erythrocyte membrane glycoprotein Rh50)         |
| Erythrocyte proteins | Erythrocyte       | Q08495  | Dematin (Dematin actin-binding protein) (Erythrocyte membrane protein band 4.9) |
| Other blood proteins | Prealbumins       | P02766  | Transthyretin                                                                   |
| Other blood proteins | Prealbumins       | P01009  | Alpha-1-antitrypsin                                                             |
| Other blood proteins | Alpha 1 globulins | P02763  | Alpha-1-acid glycoprotein 1                                                     |
| Other blood proteins | Alpha 1 globulins | P19652  | Alpha-1-acid glycoprotein 2                                                     |
| Other blood proteins | Alpha 2 globulins | P00738  | Haptoglobin                                                                     |
| Other blood proteins | Alpha 2 globulins | P01023  | $\alpha$ 2-macroglobulin                                                        |
| Other blood proteins | Alpha 2 globulins | P00450  | Ceruloplasmin                                                                   |
| Other blood proteins | Beta globulins    | P00747  | plasminogen                                                                     |

|                      |                |        |                                          |
|----------------------|----------------|--------|------------------------------------------|
| Other blood proteins | Beta globulins | P02787 | Serotransferrin                          |
| Other blood proteins | Immunoglobins  | P01871 | Immunoglobulin heavy constant mu         |
| Other blood proteins | Immunoglobins  | P01876 | Immunoglobulin heavy constant alpha 1    |
| Other blood proteins | Immunoglobins  | P01877 | Immunoglobulin heavy constant alpha 2    |
| Other blood proteins | Immunoglobins  | P01860 | Immunoglobulin heavy constant gamma 3    |
| Other blood proteins | Immunoglobins  | P01764 | Immunoglobulin heavy variable 3-23       |
| Other blood proteins | Immunoglobins  | P01857 | Immunoglobulin heavy constant gamma 1    |
| Other blood proteins | Immunoglobins  | P01859 | Immunoglobulin heavy constant gamma 2    |
| Other blood proteins | Immunoglobins  | P23083 | Immunoglobulin heavy variable 1-2        |
| Other blood proteins | Immunoglobins  | P01861 | Immunoglobulin heavy constant gamma 4    |
| Other blood proteins | Immunoglobins  | P01780 | Immunoglobulin heavy variable 3-7        |
| Other blood proteins | Immunoglobins  | P01766 | Immunoglobulin heavy variable 3-13       |
| Other blood proteins | Immunoglobins  | P01880 | Immunoglobulin heavy constant delta      |
| Other blood proteins | Immunoglobins  | P01743 | Immunoglobulin heavy variable 1-46       |
| Other blood proteins | Immunoglobins  | P06331 | Immunoglobulin heavy variable 4-34       |
| Other blood proteins | Immunoglobins  | P01619 | Immunoglobulin kappa variable 3-20       |
| Other blood proteins | Immunoglobins  | P01834 | Immunoglobulin kappa constant            |
| Other blood proteins | Immunoglobins  | P01593 | Immunoglobulin kappa variable 1D-33      |
| Other blood proteins | Immunoglobins  | P01602 | Immunoglobulin kappa variable 1-5        |
| Other blood proteins | Immunoglobins  | P06312 | Immunoglobulin kappa variable 4-1        |
| Other blood proteins | Immunoglobins  | P01611 | Immunoglobulin kappa variable 1D-12      |
| Other blood proteins | Immunoglobins  | P04430 | Immunoglobulin kappa variable 1-16       |
| Other blood proteins | Immunoglobins  | P06310 | Immunoglobulin kappa variable 2-30       |
| Other blood proteins | Immunoglobins  | P04433 | Immunoglobulin kappa variable 3-11       |
| Other blood proteins | Immunoglobins  | P01701 | Immunoglobulin lambda variable 1-51      |
| Other blood proteins | Immunoglobins  | P01700 | Immunoglobulin lambda variable 1-47      |
| Other blood proteins | Immunoglobins  | A0M8Q6 | Immunoglobulin lambda constant 7         |
| Other blood proteins | Immunoglobins  | P80748 | Immunoglobulin lambda variable 3-21      |
| Other blood proteins | Immunoglobins  | P01717 | Immunoglobulin lambda variable 3-25      |
| Other blood proteins | Immunoglobins  | P01714 | Immunoglobulin lambda variable 3-19      |
| Other blood proteins | Immunoglobins  | P01715 | Immunoglobulin lambda variable 3-1       |
| Other blood proteins | Immunoglobins  | B9A064 | Immunoglobulin lambda-like polypeptide 5 |
| Other blood proteins | Immunoglobins  | P04211 | Immunoglobulin lambda variable 7-43      |
| Other blood proteins | Immunoglobins  | P0DOY2 | Immunoglobulin lambda constant 2         |
| Other blood proteins | Platelet       | P02776 | Platelet factor 4                        |
| Other blood proteins | Platelet       | P13224 | Platelet glycoprotein Ib beta chain      |

**Supplementary Table 2.** Proteins that were altered in adipose tissue by MIH compared to normoxia exposure in overweight and obese individuals at a significance level of  $p < 0.05$ .

| Uniprot | Gene    | Name                                                           | Fold change<br>(MIH /<br>Normoxia) | <i>p</i> -value |
|---------|---------|----------------------------------------------------------------|------------------------------------|-----------------|
| Q99715  | COL12A1 | Collagen alpha-1(XII) chain                                    | 4,07                               | 0,041           |
| Q13201  | MMRN1   | Multimerin-1                                                   | 2,34                               | 0,029           |
| O00194  | RAB27B  | Ras-related protein Rab-27B                                    | 2,16                               | 0,008           |
| P80188  | LCN2    | Neutrophil gelatinase-associated lipocalin                     | 2,04                               | 0,018           |
| P28289  | TMOD1   | Tropomodulin-1                                                 | 1,97                               | 0,006           |
| P31146  | CORO1A  | Coronin-1A                                                     | 1,93                               | 0,018           |
| P05106  | ITGB3   | Integrin beta-3                                                | 1,92                               | 0,027           |
| P13473  | LAMP2   | Lysosome-associated membrane<br>glycoprotein 2                 | 1,85                               | 0,025           |
| P11166  | SLC2A1  | Glucose transporter type 1                                     | 1,81                               | 0,006           |
| P41091  | EIF2S3  | Eukaryotic translation initiation factor 2<br>subunit 3        | 1,8                                | 0,044           |
| P02788  | LTF     | Lactotransferrin                                               | 1,66                               | 0,049           |
| P02730  | SLC4A1  | Solute carrier family 4 member 1                               | 1,65                               | 0,015           |
| P29972  | AQP1    | Aquaporin-1                                                    | 1,63                               | 0,013           |
| P09543  | CNP     | 2',3'-cyclic-nucleotide 3'-phosphodiesterase                   | 1,61                               | 0,038           |
| P54725  | RAD23A  | UV excision repair protein RAD23<br>homolog A                  | 1,6                                | 0,037           |
| Q15942  | ZYX     | Zyxin                                                          | 1,59                               | 0,018           |
| O60256  | PRPSAP2 | Phosphoribosyl pyrophosphate synthase-<br>associated protein 2 | 1,5                                | 0,018           |
| P18577  | RHCE    | CD antigen CD240CE                                             | 1,49                               | 0,029           |
| P04843  | RPN1    | Ribophorin-1                                                   | 1,48                               | 0,03            |
| O14561  | NDUFAB1 | Acyl carrier protein, mitochondrial                            | 1,43                               | 0,022           |
| Q6XQN6  | NAPRT   | Nicotinate phosphoribosyltransferase                           | 1,42                               | 0,033           |
| Q9ULV4  | CORO1C  | Coronin-1C                                                     | 1,41                               | 0,048           |
| P07384  | CAPN1   | Calpain-1 catalytic subunit                                    | 1,39                               | 0,013           |
| P21333  | FLNA    | Filamin-A                                                      | 1,38                               | 0,015           |
| P52566  | ARHGDI1 | Rho GDP-dissociation inhibitor                                 | 1,38                               | 0,037           |
| P07451  | CA3     | Carbonic anhydrase 3                                           | 1,36                               | 0,009           |
| P04439  | HLA-A   | HLA class I histocompatibility antigen, A<br>alpha chain       | 1,36                               | 0,035           |
| Q9NYL9  | TMOD3   | Tropomodulin-3                                                 | 1,32                               | 0,039           |
| O15511  | ARPC5   | Actin-related protein 2/3 complex subunit 5                    | 1,3                                | 0,015           |
| P16104  | H2AX    | Histone H2AX                                                   | 1,29                               | 0,007           |
| P67936  | TPM4    | Tropomyosin alpha-4 chain                                      | 1,27                               | 0,047           |

|        |          |                                                                      |      |       |
|--------|----------|----------------------------------------------------------------------|------|-------|
| P54920 | NAPA     | Alpha-soluble NSF attachment protein                                 | 1,26 | 0,025 |
| P07737 | PFN1     | Profilin-1                                                           | 1,25 | 0,027 |
| P06753 | TPM3     | Tropomyosin alpha-3 chain                                            | 1,24 | 0,043 |
| Q9H773 | DCTPP1   | dCTP pyrophosphatase 1                                               | 1,23 | 0,043 |
| P61026 | RAB10    | Ras-related protein Rab-10                                           | 1,23 | 0,027 |
| P09493 | TPM1     | Tropomyosin alpha-1 chain                                            | 1,21 | 0,016 |
| P22061 | PCMT1    | Protein-L-isoaspartate(D-aspartate) O-methyltransferase              | 1,21 | 0,015 |
| P26447 | S100A4   | Protein S100-A4                                                      | 1,2  | 0,05  |
| P30626 | SRI      | Sorcini                                                              | 1,17 | 0,022 |
| P48643 | CCT5     | T-complex protein 1 subunit epsilon                                  | 1,15 | 0,021 |
| P50395 | GDI2     | Rab GDP dissociation inhibitor beta                                  | 1,09 | 0,026 |
| P0DMV8 | HSPA1A   | Heat shock 70 kDa protein 1A                                         | 0,88 | 0,022 |
| P49368 | CCT3     | T-complex protein 1 subunit gamma                                    | 0,87 | 0,026 |
| P05091 | ALDH2    | Aldehyde dehydrogenase, mitochondrial                                | 0,81 | 0,001 |
| P61981 | YWHAG    | 14-3-3 protein gamma                                                 | 0,8  | 0,047 |
| P00338 | LDHA     | L-lactate dehydrogenase A chain                                      | 0,8  | 0,046 |
| Q9NWX4 | CZIB     | CXXC motif containing zinc binding protein                           | 0,79 | 0,032 |
| P11047 | LAMC1    | Laminin subunit gamma-1                                              | 0,78 | 0,049 |
| Q99536 | VAT1     | Synaptic vesicle membrane protein VAT-1 homolog                      | 0,78 | 0,004 |
| P99999 | CYCS     | Cytochrome c                                                         | 0,77 | 0,04  |
| P98160 | HSPG2    | Basement membrane-specific heparan sulfate proteoglycan core protein | 0,76 | 0,041 |
| P07355 | ANXA2    | Annexin A2                                                           | 0,76 | 0,036 |
| P13671 | C6       | Complement component C6                                              | 0,76 | 0,023 |
| Q9HBL0 | TNS1     | Tensin-1                                                             | 0,75 | 0,035 |
| P19827 | ITIH1    | Inter-alpha-trypsin inhibitor heavy chain H1                         | 0,75 | 0,043 |
| P01008 | SERPINC1 | Antithrombin-III                                                     | 0,75 | 0,037 |
| P16403 | H1-2     | Histone H1.2                                                         | 0,73 | 0,009 |
| Q96Q06 | PLIN4    | Perilipin-4                                                          | 0,72 | 0,036 |
| Q13813 | SPTAN1   | Spectrin alpha chain, non-erythrocytic 1                             | 0,72 | 0,039 |
| P49327 | FASN     | Fatty acid synthase                                                  | 0,7  | 0,049 |
| P07585 | DCN      | Decorin                                                              | 0,7  | 0,046 |
| P25311 | AZGP1    | Zinc-alpha-2-glycoprotein                                            | 0,7  | 0,04  |
| P55268 | LAMB2    | Laminin subunit beta-2                                               | 0,7  | 0,026 |
| Q8WTS1 | ABHD5    | 1-acylglycerol-3-phosphate O-acyltransferase ABHD5                   | 0,7  | 0,003 |
| Q02218 | OGDH     | 2-oxoglutarate dehydrogenase, mitochondrial                          | 0,7  | 0,044 |
| P49189 | ALDH9A1  | Aldehyde dehydrogenase family 9 member A1                            | 0,69 | 0,022 |

|        |        |                                                                   |      |       |
|--------|--------|-------------------------------------------------------------------|------|-------|
| P59768 | GNG2   | Guanine nucleotide-binding protein G(I)/G(S)/G(O) subunit gamma-2 | 0,69 | 0,024 |
| P43686 | PSMC4  | 26S proteasome regulatory subunit 6B                              | 0,68 | 0,049 |
| P22676 | CALB2  | Calretinin                                                        | 0,68 | 0,049 |
| Q9BRX8 | PRXL2A | Peroxiredoxin-like 2A                                             | 0,68 | 0,044 |
| P22352 | GPX3   | Glutathione peroxidase 3                                          | 0,68 | 0,041 |
| P09936 | UCHL1  | Ubiquitin carboxyl-terminal hydrolase isozyme L1                  | 0,67 | 0,044 |
| Q16363 | LAMA4  | Laminin subunit alpha-4                                           | 0,66 | 0,034 |
| Q13642 | FHL1   | Four and a half LIM domains protein 1                             | 0,66 | 0,043 |
| Q6NZI2 | CAVIN1 | Caveolae-associated protein 1                                     | 0,66 | 0,043 |
| O60240 | PLIN1  | Perilipin-1                                                       | 0,65 | 0,019 |
| Q07507 | DPT    | Dermatopontin                                                     | 0,65 | 0,026 |
| Q16851 | UGP2   | UDP-glucose pyrophosphorylase                                     | 0,65 | 0,008 |
| Q9UHG3 | PCYOX1 | Prenylcysteine oxidase 1                                          | 0,64 | 0,037 |
| P50238 | CRIP1  | Cysteine-rich protein 1                                           | 0,64 | 0,039 |
| Q9NZN4 | EHD2   | EH domain-containing protein 2                                    | 0,64 | 0,026 |
| Q16555 | DPYSL2 | Dihydropyrimidinase-related protein 2                             | 0,64 | 0,024 |
| P14543 | NID1   | Nidogen-1                                                         | 0,64 | 0,045 |
| O00159 | MYO1C  | Unconventional myosin-Ic                                          | 0,64 | 0,022 |
| P07099 | EPHX1  | Epoxide hydrolase 1                                               | 0,64 | 0,014 |
| P15090 | FABP4  | Fatty acid-binding protein 4                                      | 0,63 | 0,034 |
| Q12797 | ASPH   | Aspartyl/asparaginyl beta-hydroxylase                             | 0,62 | 0,046 |
| P06737 | PYGL   | Glycogen phosphorylase, liver form                                | 0,62 | 0,006 |
| P10301 | RRAS   | Ras-related protein R-Ras                                         | 0,61 | 0,017 |
| O75874 | IDH1   | Isocitrate dehydrogenase [NADP] cytoplasmic                       | 0,61 | 0,033 |
| P21397 | MAOA   | Monoamine oxidase type A                                          | 0,61 | 0,045 |
| Q04828 | AKR1C1 | Aldo-keto reductase family 1 member C1                            | 0,6  | 0,047 |
| Q14112 | NID2   | Nidogen-2                                                         | 0,6  | 0,019 |
| Q02952 | AKAP12 | A-kinase anchor protein 12                                        | 0,59 | 0,008 |
| P49753 | ACOT2  | Acyl-coenzyme A thioesterase 2                                    | 0,59 | 0,038 |
| P02511 | CRYAB  | Alpha-crystallin B chain                                          | 0,58 | 0,017 |
| P19105 | MYL12A | Myosin regulatory light chain 12A                                 | 0,58 | 0,033 |
| P15559 | NQO1   | NAD(P)H dehydrogenase [quinone] 1                                 | 0,58 | 0,022 |
| P11766 | ADH5   | Alcohol dehydrogenase class-3                                     | 0,57 | 0,025 |
| P52895 | AKR1C2 | Aldo-keto reductase family 1 member C2                            | 0,57 | 0,024 |
| P21695 | GPD1   | Glycerol-3-phosphate dehydrogenase [NAD(+)], cytoplasmic          | 0,56 | 0,016 |
| P30084 | ECHS1  | Enoyl-CoA hydratase, mitochondrial                                | 0,56 | 0,027 |
| Q05469 | LIPE   | Hormone-sensitive lipase                                          | 0,56 | 0,027 |
| P09417 | QDPR   | Dihydropteridine reductase                                        | 0,55 | 0,034 |

|        |          |                                               |      |       |
|--------|----------|-----------------------------------------------|------|-------|
| P10620 | MGST1    | Microsomal glutathione S-transferase 1        | 0,55 | 0,042 |
| P36543 | ATP6V1E1 | V-type proton ATPase subunit E 1              | 0,54 | 0,026 |
| P00325 | ADH1B    | Alcohol dehydrogenase 1B                      | 0,54 | 0,021 |
| P60903 | S100A10  | Protein S100-A10                              | 0,54 | 0,022 |
|        |          | Sorbin and SH3 domain-containing protein      |      |       |
| Q9BX66 | SORBS1   | 1                                             | 0,53 | 0,019 |
| P46939 | UTRN     | Utrophin                                      | 0,52 | 0,047 |
| Q9NVD7 | PARVA    | Alpha-parvin                                  | 0,51 | 0,015 |
|        |          | Hydroxyacyl-coenzyme A dehydrogenase,         |      |       |
| Q16836 | HADH     | mitochondrial                                 | 0,51 | 0,018 |
| P54819 | AK2      | Adenylate kinase 2, mitochondrial             | 0,51 | 0,045 |
|        |          | Succinyl-CoA:3-ketoacid coenzyme A            |      |       |
| P55809 | OXCT1    | transferase 1, mitochondrial                  | 0,5  | 0,034 |
| P36871 | PGM1     | Phosphoglucomutase-1                          | 0,48 | 0,02  |
| P48047 | ATP5PO   | ATP synthase subunit O, mitochondrial         | 0,47 | 0,041 |
| P08294 | SOD3     | Extracellular superoxide dismutase            | 0,47 | 0,02  |
|        |          | Histidine triad nucleotide-binding protein 2, |      |       |
| Q9BX68 | HINT2    | mitochondrial                                 | 0,46 | 0,021 |
| P22105 | TNXB     | Tenascin-X                                    | 0,44 | 0,022 |
| O76070 | SNCG     | Gamma-synuclein                               | 0,43 | 0,025 |
|        |          | Pyruvate dehydrogenase E1 component           |      |       |
| P11177 | PDHB     | subunit beta, mitochondrial                   | 0,42 | 0,03  |
|        |          | Ribosylidihydronicotinamide dehydrogenase     |      |       |
| P16083 | NQO2     | [quinone]                                     | 0,33 | 0,014 |

**Supplementary Table 3.** Functional groups affected by mild intermittent hypoxia exposure. After functional annotation of differentially expressed proteins, 11 functional groups were identified ( $p < 0.05$ , corrected with Bonferroni step-down procedure) covering 104 GO terms and KEGG pathways, which were altered by mild intermittent hypoxia exposure.  $p$ -values are corrected with Bonferroni step-down procedure. GO, Gene Ontology; KEGG, Kyoto Encyclopedia of Genes and Genomes.

| Functional group                      | GO Term                                             | GO ID      | GO Term $p$ -value | Functional group $p$ -value |
|---------------------------------------|-----------------------------------------------------|------------|--------------------|-----------------------------|
| cellular iron ion homeostasis         | cellular iron ion homeostasis                       | GO:0006879 | 5,86E-02           | 1,17E-02                    |
| bicarbonate transport                 | bicarbonate transport                               | GO:0015701 | 9,01E-02           | 9,66E-03                    |
| platelet degranulation                | platelet degranulation                              | GO:0002576 | 8,23E-02           | 1,03E-02                    |
| collagen fibril organization          | collagen fibril organization                        | GO:0030199 | 2,41E-02           | 3,05E-03                    |
| myeloid cell development              | myeloid cell development                            | GO:0061515 | 7,39E-02           | 9,48E-03                    |
| Regulation of lipolysis in adipocytes | Regulation of lipolysis in adipocytes               | KEGG:04923 | 3,23E-02           | 1,03E-02                    |
|                                       | PPAR signaling pathway                              | KEGG:03320 | 7,23E-02           | 1,03E-02                    |
|                                       | neutral lipid catabolic process                     | GO:0046461 | 9,61E-02           | 1,03E-02                    |
|                                       | glycerolipid catabolic process                      | GO:0046503 | 4,39E-02           | 1,03E-02                    |
|                                       | acylglycerol catabolic process                      | GO:0046464 | 9,61E-02           | 1,03E-02                    |
| ADP metabolic process                 | triglyceride catabolic process                      | GO:0019433 | 7,43E-02           | 1,03E-02                    |
|                                       | ADP metabolic process                               | GO:0046031 | 2,38E-02           | 4,91E-03                    |
|                                       | purine nucleoside diphosphate metabolic process     | GO:0009135 | 3,68E-02           | 4,91E-03                    |
|                                       | ribonucleoside diphosphate metabolic process        | GO:0009185 | 3,92E-02           | 4,91E-03                    |
|                                       | ATP generation from ADP                             | GO:0006757 | 7,41E-02           | 4,91E-03                    |
|                                       | purine ribonucleoside diphosphate metabolic process | GO:0009179 | 3,68E-02           | 4,91E-03                    |
| polysaccharide biosynthetic process   | glycolytic process                                  | GO:0006096 | 7,36E-02           | 4,91E-03                    |
|                                       | polysaccharide biosynthetic process                 | GO:0000271 | 2,03E-02           | 1,23E-02                    |
|                                       | Starch and sucrose metabolism                       | KEGG:00500 | 7,40E-02           | 1,23E-02                    |
|                                       | polysaccharide metabolic process                    | GO:0005976 | 8,86E-02           | 1,23E-02                    |
|                                       | energy reserve metabolic process                    | GO:0006112 | 9,66E-02           | 1,23E-02                    |
|                                       | cellular carbohydrate biosynthetic process          | GO:0034637 | 9,96E-02           | 1,23E-02                    |



|                                                       |                                               |            |          |          |
|-------------------------------------------------------|-----------------------------------------------|------------|----------|----------|
|                                                       | cellular polysaccharide metabolic process     | GO:0044264 | 1,00E-01 | 1,23E-02 |
|                                                       | glucan metabolic process                      | GO:0044042 | 8,21E-02 | 1,23E-02 |
|                                                       | cellular glucan metabolic process             | GO:0006073 | 8,21E-02 | 1,23E-02 |
|                                                       | cellular polysaccharide biosynthetic process  | GO:0033692 | 3,24E-02 | 1,23E-02 |
|                                                       | glycogen metabolic process                    | GO:0005977 | 8,09E-02 | 1,23E-02 |
|                                                       | glucan biosynthetic process                   | GO:0009250 | 1,04E-01 | 1,23E-02 |
|                                                       | glycogen biosynthetic process                 | GO:0005978 | 1,04E-01 | 1,23E-02 |
| Actin cytoskeleton organization                       | substrate adhesion-dependent cell spreading   | GO:0034446 | 7,37E-04 | 1,04E-06 |
|                                                       | Cardiac muscle contraction                    | KEGG:04260 | 8,47E-02 | 1,04E-06 |
|                                                       | Hypertrophic cardiomyopathy (HCM)             | KEGG:05410 | 9,26E-02 | 1,04E-06 |
|                                                       | Dilated cardiomyopathy (DCM)                  | KEGG:05414 | 9,66E-02 | 1,04E-06 |
|                                                       | actin-mediated cell contraction               | GO:0070252 | 1,59E-03 | 1,04E-06 |
|                                                       | muscle cell migration                         | GO:0014812 | 8,98E-02 | 1,04E-06 |
|                                                       | actin-myosin filament sliding                 | GO:0033275 | 9,36E-03 | 1,04E-06 |
|                                                       | regulation of ATPase activity                 | GO:0043462 | 8,21E-02 | 1,04E-06 |
|                                                       | smooth muscle cell migration                  | GO:0014909 | 7,05E-02 | 1,04E-06 |
|                                                       | muscle filament sliding                       | GO:0030049 | 9,36E-03 | 1,04E-06 |
|                                                       | myofibril assembly                            | GO:0030239 | 6,77E-02 | 1,04E-06 |
|                                                       | ruffle organization                           | GO:0031529 | 1,05E-01 | 1,04E-06 |
|                                                       | positive regulation of ATPase activity        | GO:0032781 | 9,55E-02 | 1,04E-06 |
|                                                       | negative regulation of protein polymerization | GO:0032272 | 7,28E-02 | 1,04E-06 |
| positive regulation of actin filament bundle assembly | GO:0032233                                    | 5,18E-02   | 1,04E-06 |          |
| negative regulation of actin filament polymerization  | GO:0030837                                    | 4,63E-02   | 1,04E-06 |          |
| Focal adhesion                                        | Focal adhesion                                | KEGG:04510 | 6,87E-04 | 2,80E-09 |
|                                                       | ECM-receptor interaction                      | KEGG:04512 | 2,27E-03 | 2,80E-09 |
|                                                       | Prion diseases                                | KEGG:05020 | 6,98E-02 | 2,80E-09 |
|                                                       | Toxoplasmosis                                 | KEGG:05145 | 4,80E-02 | 2,80E-09 |
|                                                       | Small cell lung cancer                        | KEGG:05222 | 8,98E-02 | 2,80E-09 |
|                                                       | muscle cell migration                         | GO:0014812 | 8,98E-02 | 2,80E-09 |
|                                                       | substrate adhesion-dependent cell spreading   | GO:0034446 | 7,37E-04 | 2,80E-09 |
|                                                       | cell-substrate junction organization          | GO:0150115 | 9,14E-03 | 2,80E-09 |
|                                                       | smooth muscle cell migration                  | GO:0014909 | 7,05E-02 | 2,80E-09 |

|                            |                                                                                                          |            |          |          |
|----------------------------|----------------------------------------------------------------------------------------------------------|------------|----------|----------|
|                            | extracellular matrix assembly                                                                            | GO:0085029 | 9,27E-02 | 2,80E-09 |
|                            | positive regulation of cell-matrix<br>adhesion                                                           | GO:0001954 | 9,23E-02 | 2,80E-09 |
|                            | cell-substrate junction assembly                                                                         | GO:0007044 | 7,25E-03 | 2,80E-09 |
|                            | neuromuscular junction<br>development                                                                    | GO:0007528 | 1,14E-01 | 2,80E-09 |
|                            | basement membrane organization                                                                           | GO:0071711 | 5,08E-03 | 2,80E-09 |
|                            | glomerulus development                                                                                   | GO:0032835 | 8,67E-02 | 2,80E-09 |
|                            | glomerular basement membrane<br>development                                                              | GO:0032836 | 4,82E-03 | 2,80E-09 |
|                            | positive regulation of actin<br>filament bundle assembly                                                 | GO:0032233 | 5,18E-02 | 2,80E-09 |
| Oxidoreductase<br>activity | oxidoreductase activity, acting on<br>the CH-OH group of donors, NAD<br>or NADP as acceptor              | GO:0016616 | 2,72E-05 | 4,67E-10 |
|                            | oxidoreductase activity, acting on<br>the aldehyde or oxo group of<br>donors, NAD or NADP as<br>acceptor | GO:0016620 | 5,95E-04 | 4,67E-10 |
|                            | oxidoreductase activity, acting on<br>the CH-CH group of donors, NAD<br>or NADP as acceptor              | GO:0016628 | 3,93E-02 | 4,67E-10 |
|                            | oxidoreductase activity, acting on<br>NAD(P)H, quinone or similar<br>compound as acceptor                | GO:0016655 | 4,90E-03 | 4,67E-10 |
|                            | tricarboxylic acid cycle                                                                                 | GO:0006099 | 8,73E-02 | 4,67E-10 |
|                            | ethanol metabolic process                                                                                | GO:0006067 | 2,54E-02 | 4,67E-10 |
|                            | aerobic respiration                                                                                      | GO:0009060 | 9,96E-02 | 4,67E-10 |
|                            | aldehyde dehydrogenase<br>[NAD(P)+] activity                                                             | GO:0004030 | 1,28E-02 | 4,67E-10 |
|                            | diterpenoid metabolic process                                                                            | GO:0016101 | 7,68E-02 | 4,67E-10 |
|                            | aldehyde dehydrogenase (NAD+)<br>activity                                                                | GO:0004029 | 9,05E-03 | 4,67E-10 |
|                            | acyl-CoA metabolic process                                                                               | GO:0006637 | 1,11E-01 | 4,67E-10 |
|                            | retinoid metabolic process                                                                               | GO:0001523 | 9,96E-02 | 4,67E-10 |
|                            | Glycolysis / Gluconeogenesis                                                                             | KEGG:00010 | 3,23E-05 | 4,67E-10 |
|                            | Citrate cycle (TCA cycle)                                                                                | KEGG:00020 | 5,18E-02 | 4,67E-10 |
|                            | Fatty acid elongation                                                                                    | KEGG:00062 | 4,09E-02 | 4,67E-10 |
|                            | Fatty acid degradation                                                                                   | KEGG:00071 | 4,13E-05 | 4,67E-10 |
|                            | Valine, leucine and isoleucine<br>degradation                                                            | KEGG:00280 | 1,42E-03 | 4,67E-10 |

|                                                                        |            |          |          |
|------------------------------------------------------------------------|------------|----------|----------|
| Lysine degradation                                                     | KEGG:00310 | 4,09E-02 | 4,67E-10 |
| Arginine and proline metabolism                                        | KEGG:00330 | 9,72E-02 | 4,67E-10 |
| Histidine metabolism                                                   | KEGG:00340 | 2,86E-02 | 4,67E-10 |
| Tyrosine metabolism                                                    | KEGG:00350 | 7,40E-02 | 4,67E-10 |
| Tryptophan metabolism                                                  | KEGG:00380 | 7,44E-04 | 4,67E-10 |
| beta-Alanine metabolism                                                | KEGG:00410 | 5,47E-02 | 4,67E-10 |
| Glutathione metabolism                                                 | KEGG:00480 | 1,07E-01 | 4,67E-10 |
| Pyruvate metabolism                                                    | KEGG:00620 | 9,36E-03 | 4,67E-10 |
| Butanoate metabolism                                                   | KEGG:00650 | 4,48E-02 | 4,67E-10 |
| Metabolism of xenobiotics by cytochrome P450                           | KEGG:00980 | 1,18E-02 | 4,67E-10 |
| Drug metabolism                                                        | KEGG:00982 | 6,21E-02 | 4,67E-10 |
| Chemical carcinogenesis                                                | KEGG:05204 | 1,60E-02 | 4,67E-10 |
| Central carbon metabolism in cancer                                    | KEGG:05230 | 5,42E-02 | 4,67E-10 |
| detoxification                                                         | GO:0098754 | 3,92E-02 | 4,67E-10 |
| electron transport chain                                               | GO:0022900 | 4,94E-03 | 4,67E-10 |
| thioester metabolic process                                            | GO:0035383 | 1,11E-01 | 4,67E-10 |
| cellular detoxification                                                | GO:1990748 | 1,61E-02 | 4,67E-10 |
| xenobiotic metabolic process                                           | GO:0006805 | 8,23E-02 | 4,67E-10 |
| oxidoreductase activity, acting on CH-OH group of donors               | GO:0016614 | 4,31E-05 | 4,67E-10 |
| oxidoreductase activity, acting on the CH-CH group of donors           | GO:0016627 | 9,19E-02 | 4,67E-10 |
| oxidoreductase activity, acting on the aldehyde or oxo group of donors | GO:0016903 | 3,76E-03 | 4,67E-10 |
| antibiotic metabolic process                                           | GO:0016999 | 2,19E-02 | 4,67E-10 |
| drug catabolic process                                                 | GO:0042737 | 9,84E-02 | 4,67E-10 |
| electron transfer activity                                             | GO:0009055 | 1,40E-02 | 4,67E-10 |
| antibiotic catabolic process                                           | GO:0017001 | 5,06E-02 | 4,67E-10 |
| primary alcohol metabolic process                                      | GO:0034308 | 4,07E-03 | 4,67E-10 |
| ethanol oxidation                                                      | GO:0006069 | 4,82E-03 | 4,67E-10 |
